# Supplementary material
Source: publisher figshare collection journal article supplement (https://acs.figshare.com/ndownloader/files/4098826)
Supplement: Supplementary file 1 [file 4098826]

## Supporting information

# Rapid cytotoxicity screening platform for amyloid inhibitors using a membrane-potential sensitive fluorescent probe

*Jihoon Kim<sup>†‡</sup>, Yasuhiko Sasaki<sup>†</sup>, Wataru Yoshida<sup>†</sup>, Natsuki Kobayashi<sup>†</sup>, Anthony J. Veloso<sup>§</sup>, Kagan*

*Kerman<sup>§</sup>, Kazunori Ikebukuro<sup>†</sup> and Koji Sode<sup>†</sup>*

<sup>†</sup>Department of Biotechnology, Graduate School of Engineering, Tokyo University of Agriculture & Technology, 2-24-16 Naka-cho, Koganei, Tokyo 184-8588, Japan

<sup>‡</sup>i-SENS, Inc. 465-14 Wolgye-dong, Nowon-gu, Seoul 139-845, South Korea

<sup>§</sup>Department of Physical and Environmental Sciences, University of Toronto Scarborough, Toronto, ON, M1C 1A4, Canada.

Corresponding author email address: sode@cc.tuat.ac.jp; Telephone/Fax: +81-42-388-7027

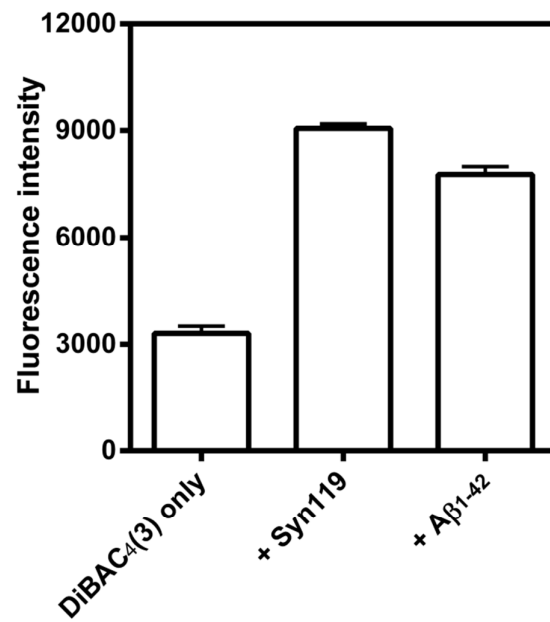

**Figure S-1.** The background signal of the novel biosensing system

The fluorescence intensity was observed in absence of proteins or presence of 12-h incubated  $\alpha$ -Syn119 (final concentration 20  $\mu$ M) and 8-h incubated A $\beta$ 1-42 (final concentration 5  $\mu$ M) when these samples were added to U2-OS cells. Error bars represent the standard deviation of triplicate measurements (n=3).

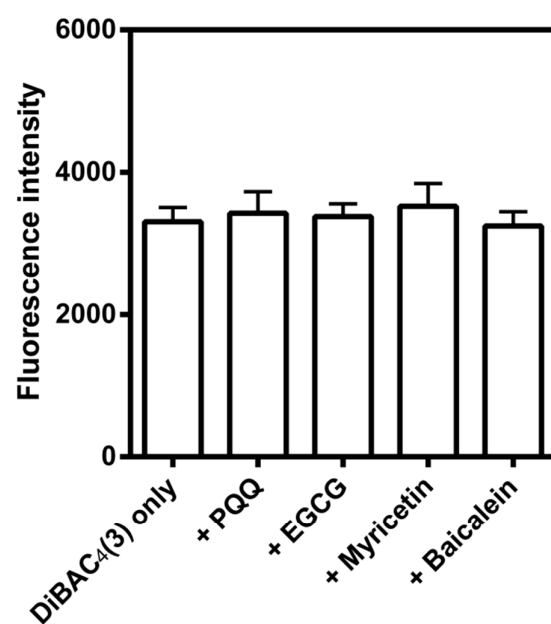

**Figure S-2.** The effect of inhibitors on the novel biosensing system

The inhibitors; PQQ (final concentration 10 $\mu$ M), EGCG, Myricetin and Baicalein (final concentration 5 $\mu$ M) were added to U2-OS cells and it was monitored by our novel biosensing system. Error bars represent standard deviation of triplicate measurements (n=3).
